# Supplementary material
Source: Springer Nature journal article supplement (https://publikationen.ub.uni-frankfurt.de/files/22066/13064_2011_173_MOESM2_ESM.PDF)

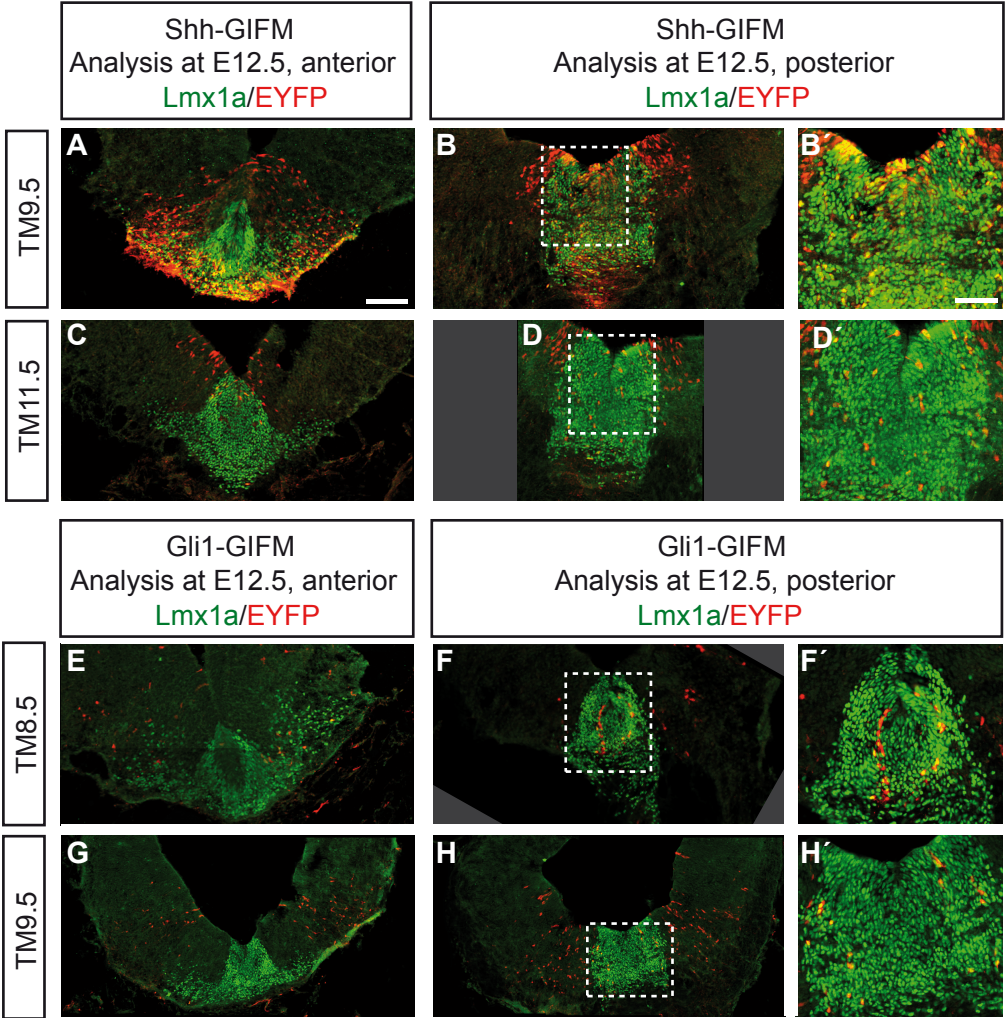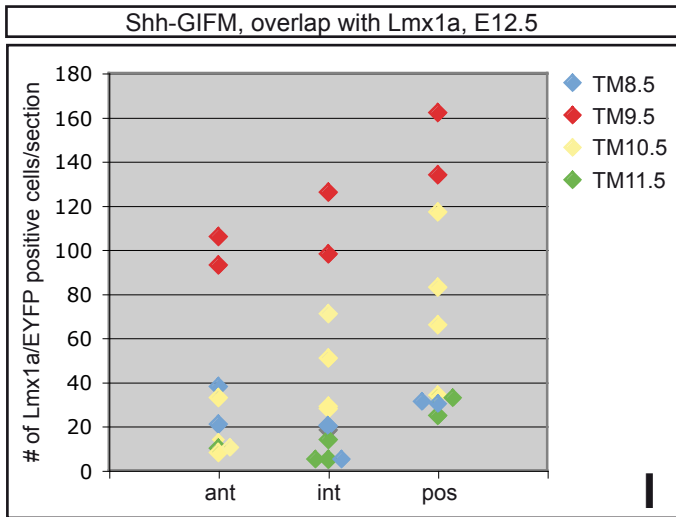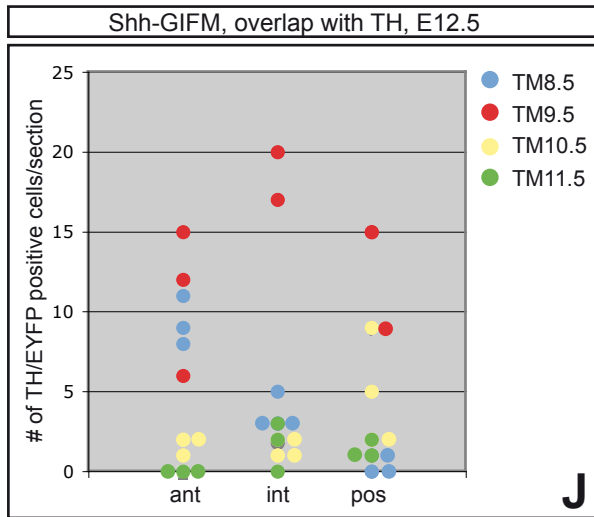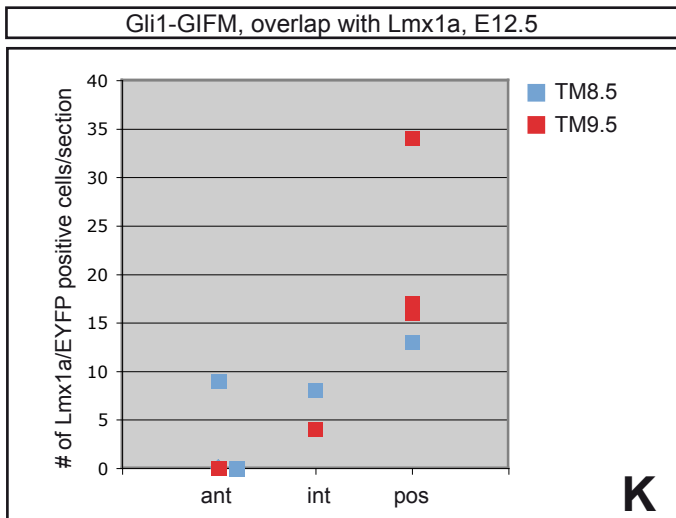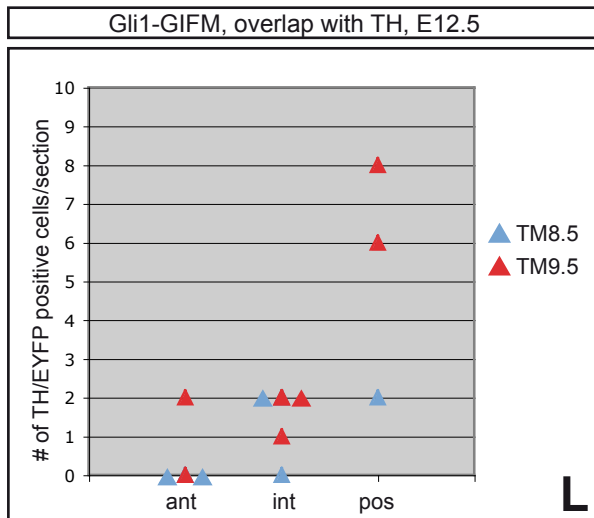

Supplement: MOESM2 [file 13064_2011_173_MOESM2_ESM.PDF]
